# Supplementary material for: Transient Activation of Hedgehog Signaling Inhibits Cellular Senescence and Inflammation in Radiated Swine Salivary Glands through Preserving Resident Macrophages
Source: MDPI journal article supplement (doi:10.3390/ijms222413493), 2021-12-16
Supplement: s1 [file s1]

**Supplemental Tabel S1. Primers for qRT-PCR.**

| Genes         |   | Primers                   |
|---------------|---|---------------------------|
| C1q A         | F | CACTGACGACGAGAGGCAG       |
|               | R | CGTCCCTCCCGTCCAGAT        |
| TNF- $\alpha$ | F | CACCACGCTCTTCTGCCTACTG    |
|               | R | GACGGGCTTATCTGAGGTTTGAG   |
| IFN- $\gamma$ | F | CAAAGATAACCAGGCCATTCAA    |
|               | R | TGATGAGTTCACTGATGGCTTTG   |
| IL-4          | F | GGCATGTACCAGCAACTTCGTC    |
|               | R | AGGTTTCCTTCTCCGTCGTGTT    |
| IL-6          | F | TAACCCCAACCACAAATGCCG     |
|               | R | AGGTGCCCCAGCTACATTATC     |
| P53           | F | AAGGGAATTTACGGGCCGAG      |
|               | R | CCCCATGCAGGAGCTGTTAC      |
| AIF1          | F | AGCCTTCAAACAGAAATACATGGAG |
|               | R | AGCCACTGGATACCTCCTTGAT    |
| ADGRE 1       | F | TTACGATGGAGTTCGCCTTGTT    |
|               | R | GTGTTATGGTTGCGGATGGTTC    |
| ITGAX         | F | CACCTTTGACAGATCCGTGTATTC  |
|               | R | TGCTCCTTCCATCATTTCTTG     |
| HGF           | F | TCTCATGCTGCTTCCCCTTC      |
|               | R | AGCAAGGCTCAGCCCAATAG      |
| ARG 1         | F | TGTCTTCCGTTTCAGTAGGTGG    |
|               | R | TACACCAGAGTCCTCCAGCC      |
